# Supplementary material
Source: publisher figshare collection journal article supplement (https://tandf.figshare.com/ndownloader/files/14207156)
Supplement: Supplementary file 1 [file 14207156]

DOCUMENTS (in order of date: yyyy/mm/dd)

ASGe, NA = Archivio di Stato di Genova, Fondo Notai Antichi (Genoa State Archive, Ancient Notaries Records)

ASR = Centro di studi e documentazione di Storia economica “Archivio Doria”, Dipartimento di Economia dell'Università degli Studi di Genova, Archivio Salvago Raggi (Center of studies and documentation of Economic History “Archivio Doria”, Department of Economy, University of Genoa, Salvago Raggi Archive)

Doc. 1 - ASGe, NA 2, 1190/04/03 (Chiaudano and Morozzo della Rocca 1938, 128-129).

Doc. 2 - ASGe, NA 6, 1191/12/14 (Hall, Krueger, and Reynolds 1938, II, 119-120).

Doc. 3 - ASGe, NA 22, 1248/04/16

Doc. 4 - ASGe, NA 579, 1438/05/12

Doc. 5 - ASGe, NA 580, 1439/05/18

Doc. 6 - ASGe, NA 580, 1439/06/18

Doc. 7 - ASGe, NA 687, 1441/03/30

Doc. 8 - ASGe, NA 785, 1449/03/04

Doc. 9 - ASGe, NA 813, 1478/02/17

Doc. 10 - ASGe, NA 1554, 1521/09/03

Doc. 11 - ASGe, NA 1554, 1521/09/28

Doc. 12 - ASGe, NA 1903, 1543/11/07

Doc. 13 - ASGe, NA 1904, 1544/08/06

Doc. 14 - ASGe, NA 1905, 1545/10/23

Doc. 15 - ASGe, NA 2408, n.d. (about 1559)

Doc. 16 - ASGe, NA 2548, 1562/10/07

Doc. 17 - ASGe, NA 4902, 1600/12/04

Doc. 18 - ASGe, NA 3982, 1603/--/--

Doc. 19 - ASGe, NA 5826, 1613/02/05

Doc. 20 - ASGe, NA 5513, 1613/03/11

Doc. 21 - ASGe, NA 4533, 1613/09/19

Doc. 22 - ASGe, NA 4533, 1614/04/07

Doc. 23 - ASGe, NA 5957, 1616/09/24

Doc. 24 - ASGe, NA 5957, 1616/10/14

Doc. 25 - ASGe, NA 4381, 1618/01/05

Doc. 26 - ASGe, NA 4549, 1618/03/14

Doc. 27 - ASGe, NA 6145, 1620/03/20

Doc. 28 - ASGe, NA 5964, 1620/05/06

Doc. 29 - ASGe, NA 5628, 1621/11/02

Doc. 30 - ASGe, NA 5010, 1621/12/29

Doc. 31 - ASGe, NA 4752, 1622/01/11

Doc. 32 - ASGe, NA 4435, 1622/05/25

Doc. 33 - ASGe, NA 3143, 1622/07/18

Doc. 34 - ASGe, NA 4563, 1622/07/30

Doc. 35 - ASGe, NA 4754, 1623/01/21

Doc. 36 - ASGe, NA 6730bis, 1623/05/13

Doc. 37 - ASGe, NA 6244, 1624/06/26

Doc. 38 - ASGe, NA 5635, 1625/09/26

Doc. 39 - ASGe, NA 5019, 1626/10/19

Doc. 40 - ASGe, NA 6730bis, 1626/11/17

Doc. 41 - ASGe, NA 5978, 1626/12/12

Doc. 42 - ASGe, NA 5639, 1627/09/20

Doc. 43 - ASGe, NA 6730bis, 1627/11/2

Doc. 44 - ASGe, NA 5137, 1629/08/08

Doc. 45 - ASGe, NA 5137, 1629/08/08 (1)

Doc. 46 - ASGe, NA 5137, 1629/08/08 (2)

Doc. 47 - ASGe, NA 5987, 1629/12/14

Doc. 48 - ASGe, NA 5028, 1630/09/06

Doc. 49 - ASGe, NA 5651, 1633/08/27

Doc. 50 - ASGe, NA 5946, 1635/07/26

Doc. 51 - ASGe, NA 5946, 1636/05/17

Doc. 52 - ASGe, NA 5189, 1636/09/26

Doc. 53 - ASGe, NA 6023, 1643/02/20

Doc. 54 - ASGe, NA 7692, 1650/04/13

Doc. 55 - ASGe, NA 7692, 1650/09/20

Doc. 56 - ASGe, NA 6044, 1652/05/14

Doc. 57 - ASGe, Fondo Balbi Piovera, 131, 1657/04/13

Doc. 58 - ASGe, NA 7540, 1666/08/06

Doc. 59 - ASGe, NA 8350bis, 1666/09/19

Doc. 60 - ASGe, NA 7540, 1671/03/17

Doc. 61 - ASR, inv. 298/1, n° 81, 1682/09/16

Doc. 62 - ASR, inv. 298/1, n° 94, 1683/01/10

Doc. 63 - ASGe, NA 8172, 1684/08/20

Doc. 64 - ASR, inv. 298/1, n° 149, 1684/10/21

Doc. 65 - ASGe, NA 10155bis, 1692/06/23
